# Supplementary material for: Three New Lanostanoids from the Mushroom Ganoderma tropicum
Source: MDPI journal article supplement (doi:10.3390/molecules20023281), 2015-02-16
Supplement: s1 [file s1]

# Supporting Information

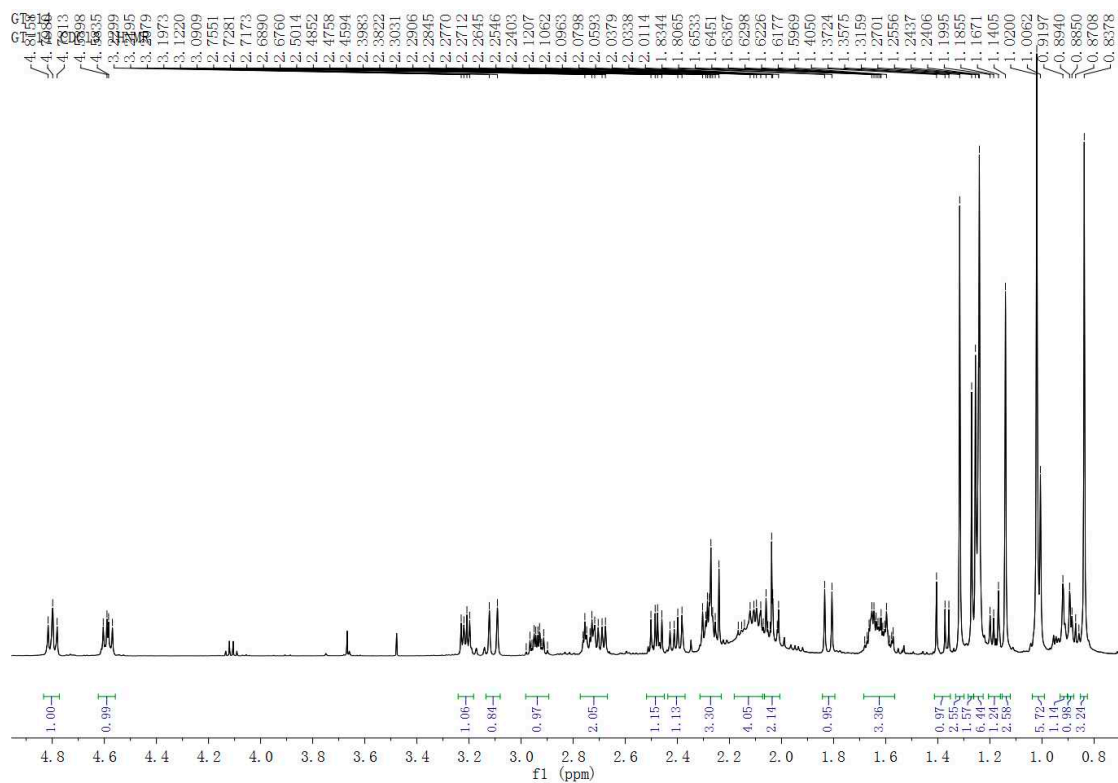

Figure S1.  $^1\text{H}$ -NMR spectrum of compound **1** ( $\text{CDCl}_3$ , 500 MHz).

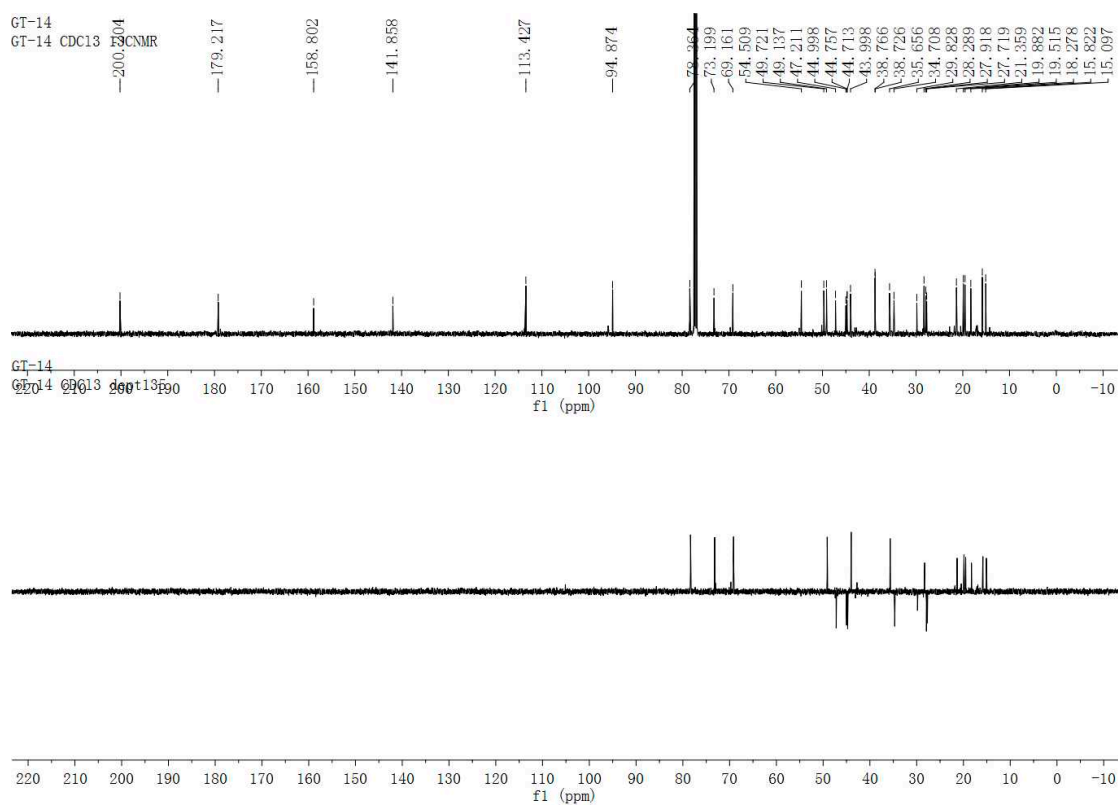

Figure S2.  $^{13}\text{C}$ -NMR spectrum of compound **1** ( $\text{CDCl}_3$ , 125 MHz).

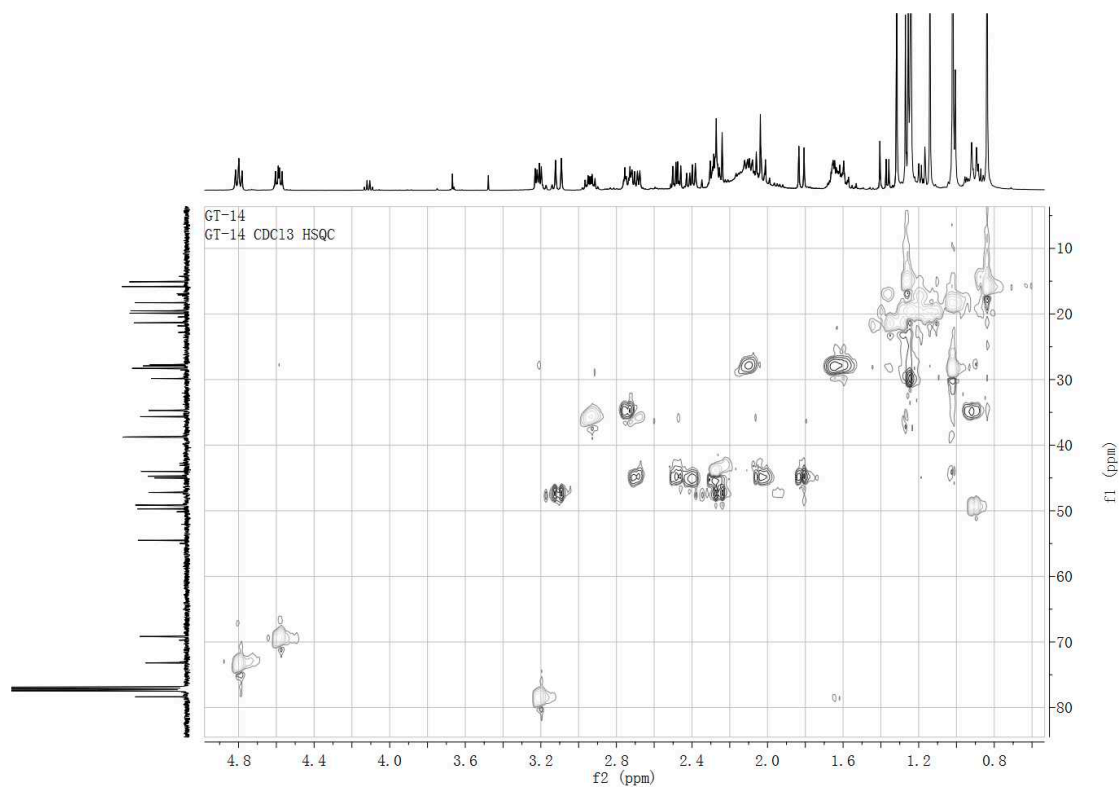

Figure S3. HSQC spectrum of compound 1.

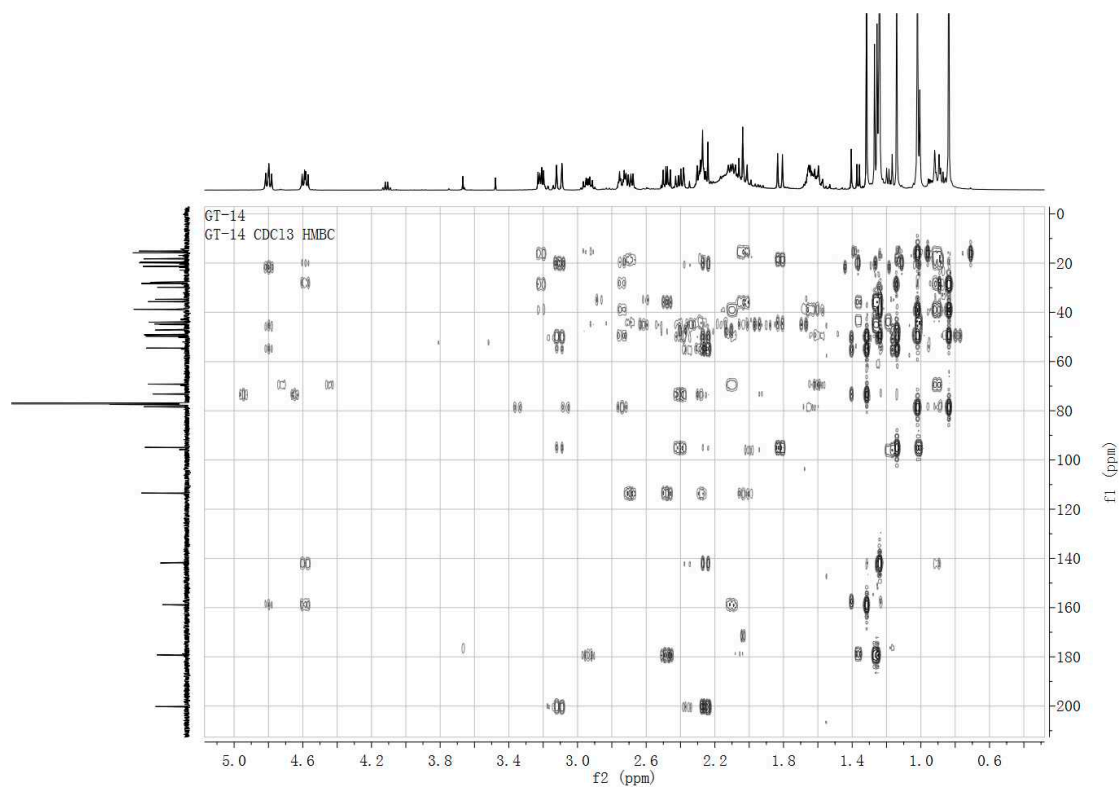

Figure S4. HMBC spectrum of compound 1.

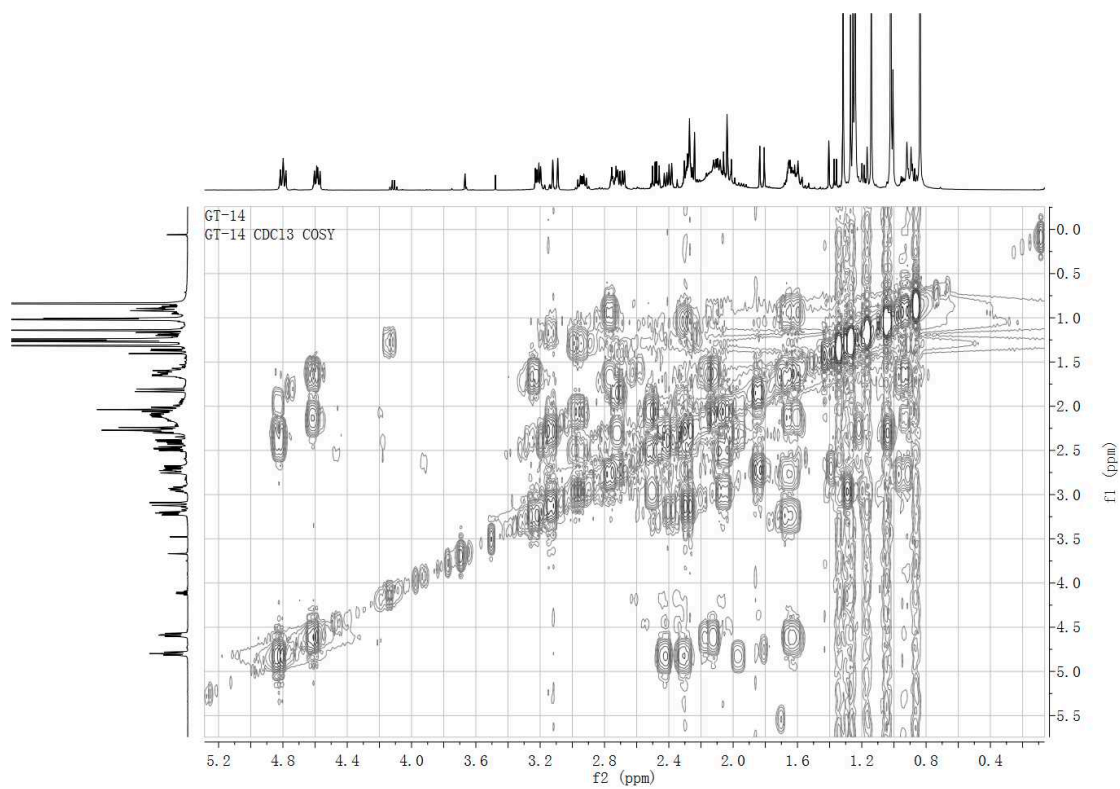

Figure S5. <sup>1</sup>H-<sup>1</sup>H COSY spectrum of compound 1.

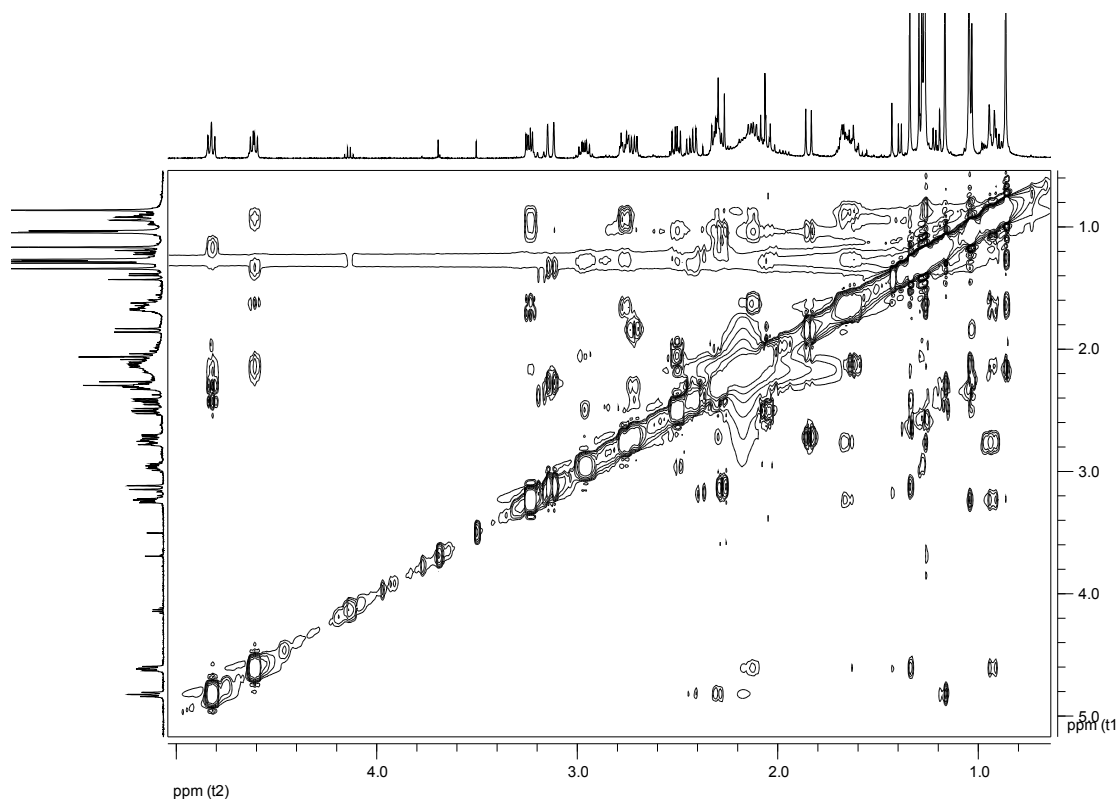

Figure S6. ROESY spectrum of compound 1.
